# Supplementary material
Source: PubMed Central journal article supplement (PMC7959891)
Supplement: 16-01127.pdf [file 16-01127.pdf]

**On-line Table 1: Characteristics of CT in the first center (A.Rothschild Foundation's Department of Radiology)**

| Parameter               | Value      |
|-------------------------|------------|
| Kilovoltage (kV)        | 120        |
| Tube current (mA)       | 150        |
| Thickness (mm)          | 0.625      |
| Detector bandwidth (mm) | 40         |
| Rotation time (s)       | 0.4        |
| Scan time (s)           | 3.3        |
| Gap (mm)                | 0          |
| FOV                     | Small body |
| Pitch (mm/rotation)     | 0.984      |
| Dosimetry (mGy × cm)    | 500        |

**On-line Table 2: Characteristics of the cervical MRI sequences in the first center (A.Rothschild Foundation's Department of Radiology)**

|                 | 3D T1 SPAIR | 3D T2 SPAIR | Postcontrast<br>3D T1 SPAIR | CE Angiography<br>3D Elliptic |
|-----------------|-------------|-------------|-----------------------------|-------------------------------|
| TR              | 350         | 2500        | 350                         | 5.7                           |
| TE              | 27          | 201         | 32                          | 2.1                           |
| FOV (mm)        | 280 × 228   | 308 × 248   | 324 × 288                   | 760 × 634                     |
| Thickness (mm)  | 1           | 1           | 0.8                         | 1                             |
| Gap (mm)        | 0           | 0           | 0                           | 0                             |
| Bandwidth (Hz)  | 930         | 852         | 728                         | 477                           |
| NEX             | 2           | 2           | 2                           | 1                             |
| No. of sections | 340         | 360         | 440                         | 250                           |

**Note:**—SPAIR indicates spectral-attenuated inversion recovery; CE, contrast-enhanced.
